# Supplementary material
Source: Springer Nature journal article supplement (https://www.springermedizin.de/resource/supplementary/12876_2012_805_MOESM2_ESM.pdf/9437548)

Additional file 2: Patient Journey Flow Chart

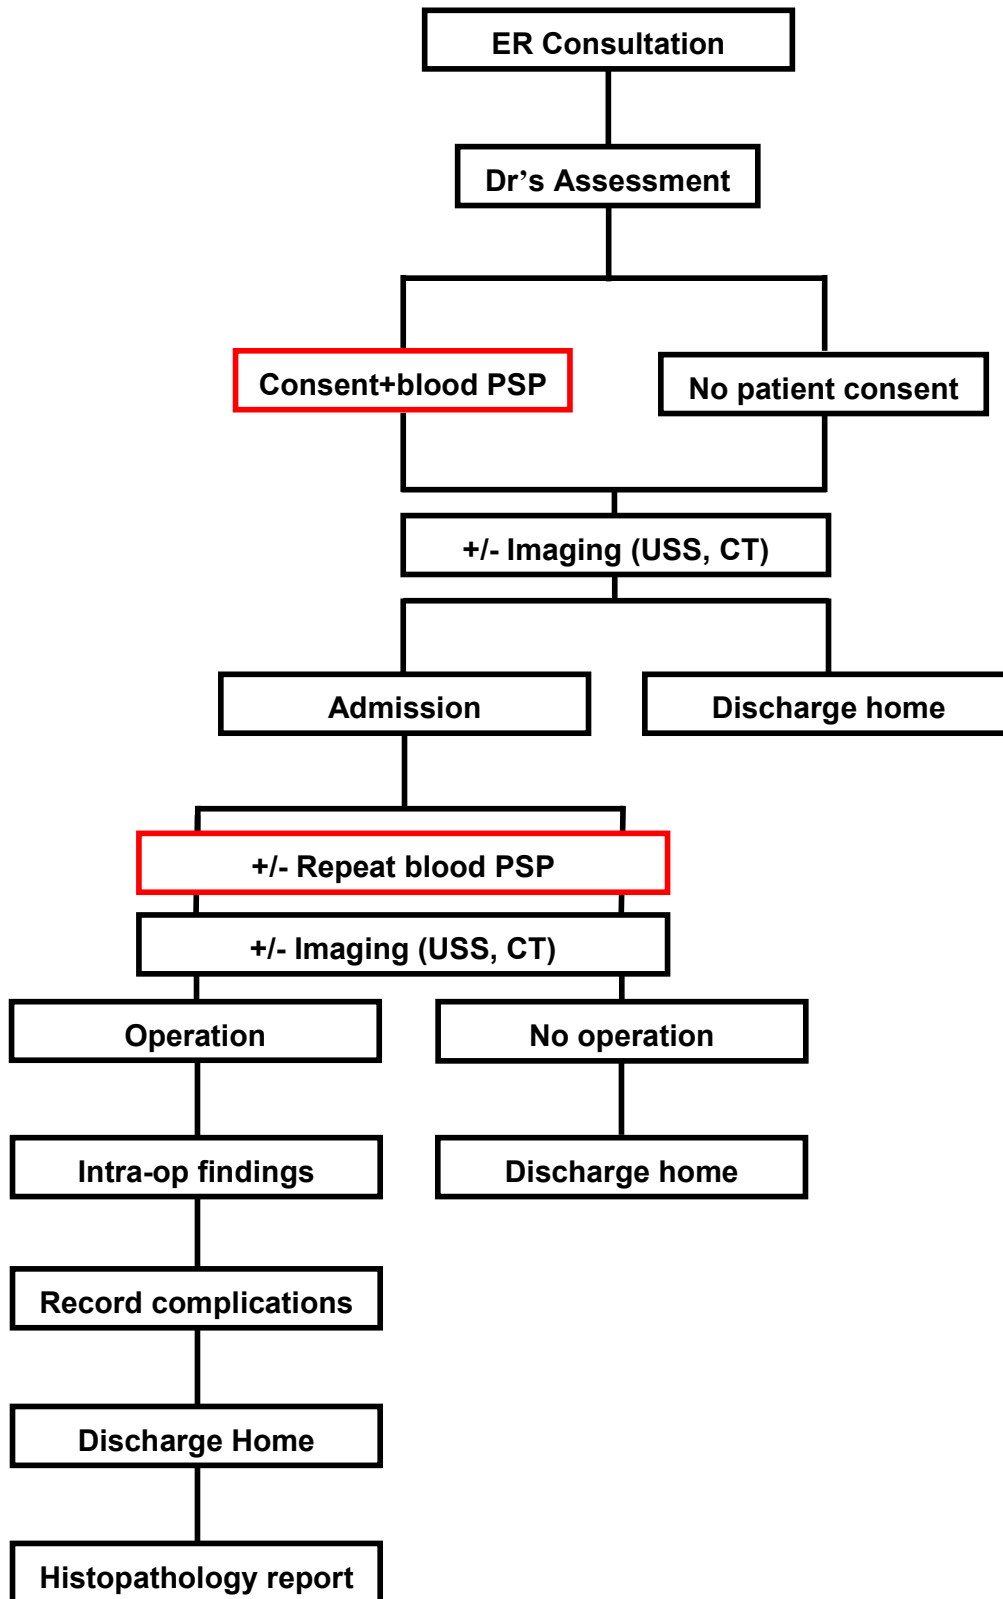

Supplement: MOESM2 [file 9437548]
